# Supplementary material
Source: Springer Nature journal article supplement (https://www.springermedizin.de/resource/supplementary/12985_2009_774_MOESM2_ESM.pdf/9608992)
Supplement: MOESM2 [file 9608992]

192-EJ07 MASKSDMVTVEVNN--GGRSKSRARSSQGRGSRVKITVNSQNKGRQNGRQKSRVNRVHVMKLRQGVTPRPAICQKATLITGIGSMTGG 98
HastV-1 N S N DK R RA P D S K R R V S S 98
HastV-2 N N H Y K K R T 98
HastV-3 K NN N R K RSR D Y T K R S 100
HastV-4 S N Y K K T 98
HastV-5 PS S R P DK R H K R V S 97
HastV-6 T R K S 98
HastV-7 N S R G F K R L K R S 99
HastV-8 S S H Y K K T 98

192-EJ07 TTEIEACILLNPLVIGDAGTGTQRPVQALGAQYSMWIKLYLNRLTSMVGASVNGTVRVSLNFTSPSTSSWGLGARGLDVTGHNAIKFLKPSD 198
HastV-1 K L T 198
HastV-2 A K L I M R V R 198
HastV-3 K V A 200
HastV-4 A D I V 198
HastV-5 K S V A 197
HastV-6 E V A 198
HastV-7 S K S A I V R A 199
HastV-8 A I V 198

192-EJ07 LGGPRDGLWLTINTNDNASDILGFSVEIHLGRMTSSYQKQHTGGLFLVELASBWCFTGYAANPLVNLVKSTDQRVWTFEGSAGTFLMNVFAASHFA 298
HastV-1 I K E N P S I SEG 298
HastV-2 I K K E HE K I AEH 298
HastV-3 M K E N I K E 300
HastV-4 I Q T G S A S D I EH 298
HastV-5 I M N E S T V 297
HastV-6 I K L M S DN I K DT 299
HastV-7 I Q T S A S I EH 298

192-EJ07 RTVAQRSLFISMARAGENTISDTVWQVLMAVASAELVTPFFNVLVGGWFFVFLIAGRVSGHRSFYVIASQDALSINKPALCTGSPGSMTRFAV 398
HastV-1 LA T TL R T T T S P G NF 398
HastV-2 MAE H SIS TFS GDA T A I T T TQ K V T GV L TTP 397
HastV-3 AVA SV TL T Q T A T T P A SG A A 400
HastV-4 MAVEH S S TLS GESS T A T A R P GVSTT QSNP 398
HastV-5 A VA T L R E S T N T P I GL SGL AAS 397
HastV-6 A T N S 398
HastV-7 AVA S TL Q T I I S A M P V G V A I 399
HastV-8 AVEH S S LS GESS T A T A R L GV A A QSNP 398

The highest peak of hydrophilicity (349) and 15aa (340-354) around VP20

VR1 VP20 VR2 VP20

192-EJ07 WTLQFTQMNQSLGHGETPAILGRSIFTSGETLKVLLITGIFSNFNETNQTWNKTIETPPG----AVWIGEDAQHYCTMNGFTLITKVDWFTEEPQ 493
HastV-1 A AI AF EY V F S M AN PLDA SGH YR AK VD L Q S AS Y ID 495
HastV-2 V HT I SI VQDFSGE R V SIM SADR V L LTA TNSNDNL AH LG LI Q MH KT E Y PD 497
HastV-3 MT A S P DNFN V Q LA TLI N L TVS QRR H AK VNN T Q P SS Y TD 497
HastV-4 R R A EP DQF IM V ALVQ RSDT N LF VT TGH DAARV WNT L IQ L DSLE L PNL 495
HastV-5 A NT A A DR I V Q VT N G NT TE VNT N NV M SSI YD M 492
HastV-6 V R T L 493
HastV-7 P VT P D F V Y Q LA TL N TTA CQQ H AK TSN T Q P SM T Y D 496
HastV-8 R A M F EP QFR V P MA TA S N V ENQ Y T I LE T Q PVES S Y AD 495

192-EJ07 PSEEPAPVGLMVLNDRGKADVIAAQYKFNPIINDKQVTSVFLVRVNEGQVTHGQSYFYRNSVNTDAVENIKIESATRHMTVFRNGSIVLLTSTVL 593
HastV-1 A IK Q VNS VK PVTQA N H L K TT N YL A ATG TT LLV GD YTAGIS T G N SI 595
HastV-2 ED T IA MS MVNIT FMK F SY NRM I I IKPLAD K QCYM K E HDN G A LTV M SPE I QV E AI 597
HastV-3 A T IP Q VNSS I L NQ N V L I K TTS N YL SYGTGT L V D TAQD N PV M T 596
HastV-4 E Q FLIPE G YIGI L M F V H N H S I IKPT N S YM F E QSDQK A L PQ WQQ N QR K V N AI 595
HastV-5 L V V MSE L M KGIN S S N H I Y K N L F E K D T T LM PQ YY N V NN 592
HastV-6 G E L Y 593
HastV-7 P IS Q V SR V L MFS T D L I K TTS N L AAGTGT F G SEQNIS SE M N AT 595
HastV-8 D S IP YARVN T GV F SSH NRM I TTS I YT I GAESGSN S L DQ Y PIQ T K M 595

192-EJ07 HTGPPVSWLWMLNQLQNDQAIYDQGHMLITPPVSSQIYFEMATIVPQTRKISGETGLELAWG--ISEDEN-FISHVDEEETEYETESDEDEDE 689
HastV-1 VD AMPP V N V KNTM HM K LV M L E T M CY L SI RS A HGVESDN I EYLDAPD SADQFKEDI DTDI T D D 690
HastV-2 KENNLPE V DRV KS TP YA ALTYF D L GN TL KISSPDPNFGSRVESHQDQDSSDDDDCE VS T D E D D 697
HastV-3 FNA APP I Q V L T L M M M ANT LL R SISGS SMISEEPTHEFGDEWDALD-ASDSRVLL D D E V D 695
HastV-4 RN P V D I T ESI YA VIA F N QN K V H TM S ARSLGLEEDQ TDNQEPD DLQTS ESDY S 682
HastV-5 SLP V M NEM V MK M T L L SL AMABEPDQ DQAVV HDS GQALPSA DSDP T 685
HastV-6 I L SG G V D Y 689
HastV-7 FNP APP I K V D NTP V M MS GT LL K T SG NVSHFDHD NFPF VMCDALD AADVWELPT DT S E D 692
HastV-8 D TS V T NI RV P M Y AA L LH VL A SEEP YVDAPLF EEPTE DSDP T N 684

192-EJ07 VDRFDLCT--SDSEDD-IESNRVLLSTLLNQMTVDRATMITSRAFF--TFNHSRRELSNDLLGSDCLATARASHACNES-----CQLSGSR 774
HastV-1 A IID E G N TD V MT R AR L SDRK GVM VSGVSPGN W E ARKAVGETNICT 783
HastV-2 A HSPYS EP S D N E R K CAE LK SVYM ASGASFSS W N D ARNVGSNQLAK D 792
HastV-3 A HSYG EP D N E R K SAG TK SVYM ASGLSPGN W E ARIMGINQTPHV D 790
HastV-4 LE--DE D EDNCTC ELVTH V ISRE Y GMS Y NVEWGGGQ TSQHQEISSDVGAGAHY CV ERK--QSSLNQ 767
HastV-5 HLS E D DV N S E R N RAARL SVY VSGLPDA W EQARKVGDNDHL A 779
HastV-6 N V N Y P P A T 774
HastV-7 A HSYG EP D N E K CAD QK SVYM ASGLSPGN W E ARIMGINQTPHV D 787
HastV-8 HPS E D DV ND A L IS E R NG RAARV SVY VSGLPDA W EQARAGDNDHL 778

192-EJ07 GHAE 779
HastV-1 788
HastV-2 796
HastV-3 794
HastV-4 771
HastV-5 783
HastV-6 778
HastV-7 791
